# Supplementary material for: SIRT1 contributes to neuroendocrine differentiation of prostate cancer
Source: Oncotarget. 2017 Dec 11;9(2):2002–16. doi: 10.18632/oncotarget.23111 (PMC5788616; doi:10.18632/oncotarget.23111)
Supplement: Supplementary file 1 [file oncotarget-09-2002-s001.pdf]

## SIRT1 contributes to neuroendocrine differentiation of prostate cancer

### SUPPLEMENTARY MATERIALS

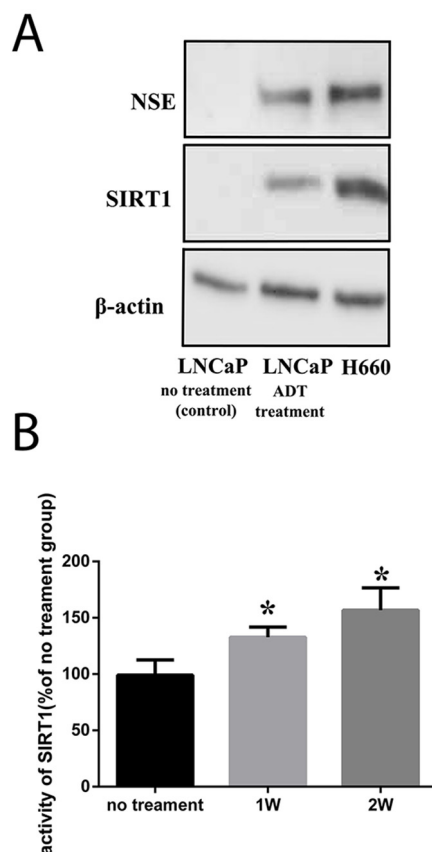

**Supplementary Figure 1: SIRT1 expression and its activity in LNCaP cells under ADT conditions.** (A) LNCaP cells were cultured in androgen deprivation conditions for 1 week, and their cell lysates subjected to western blot analysis. NCI-H660, a neuroendocrine prostate cancer cell line, was used as a positive control. (B) SIRT1 enzyme activity assay. SIRT1 activities of LNCaP cells after cultured in androgen deprivation conditions for 1 or 2 weeks.

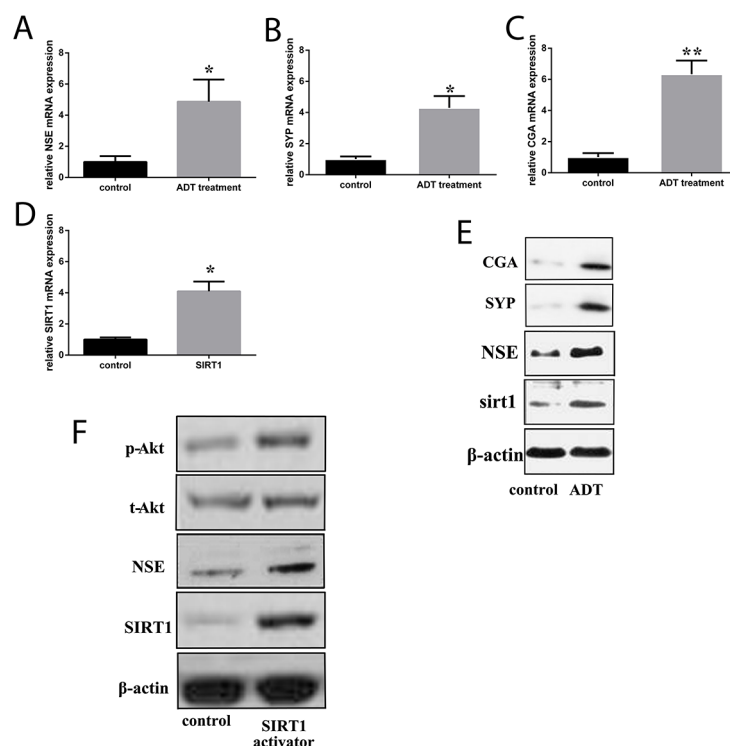

**Supplementary Figure 2: ADT induced NED of LAPC4 cells *in vitro*.** (A-C) mRNA levels of neuroendocrine genes (NSE, SYP and CGA) in cells cultured under ADT for 1 week. (D) mRNA expression level of SIRT1 in cells cultured under ADT for 1 week. Three independent experiments were performed by real-time qPCR, and the data are presented here as the mean $\pm$ SD. \*:  $p < 0.05$ ; \*\*:  $p < 0.01$ , by Student's *t*-test. (E) Protein expression levels of neuroendocrine genes (NSE, SYP and CGA) and SIRT1 in cells cultured under ADT for one week. (F) Akt was phosphorylated and activated in LAPC4 cells after 3 days of treatment with a SIRT1 activator. The SIRT1 activator also promoted SIRT1 and NSE expression.

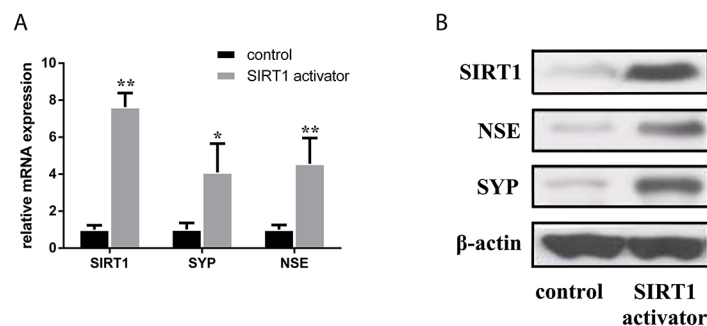

**Supplementary Figure 3: mRNA (A) and protein (B) expression levels of the candidate genes (SIRT1, SYP, NSE) in LNCaP cells after 3 days of treatment with a SIRT1 activator (SRT1720).** Three independent experiments were performed by real-time qPCR, and the data are presented as the mean $\pm$ SD. \*:  $p < 0.05$ ; \*\*:  $p < 0.01$ , by Student's *t*-test.

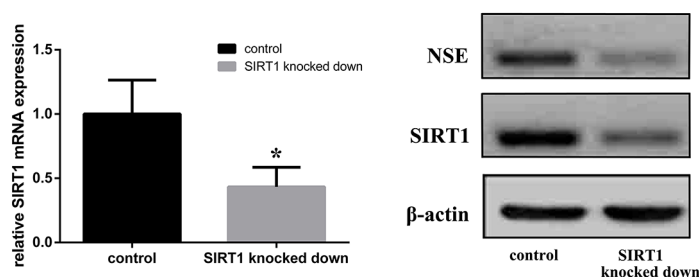

**Supplementary Figure 4: Knockdown of SIRT1 expression using siRNA decreased NSE expression in NCI-H660 cells.**

RNA was extracted from NCI-H660 cells transfected with SIRT1 siRNA or scrambled control siRNA for 3 days and analyzed via real-time qPCR. SIRT1 and NSE protein expression level decreased significantly after SIRT1 expression was knocked down in cells. Three independent experiments were performed by real-time qPCR, and the data are presented as the mean±SD (columns, mean of three different experiments; bars, SD). \*:  $p < 0.05$ , by Student's *t*-test.

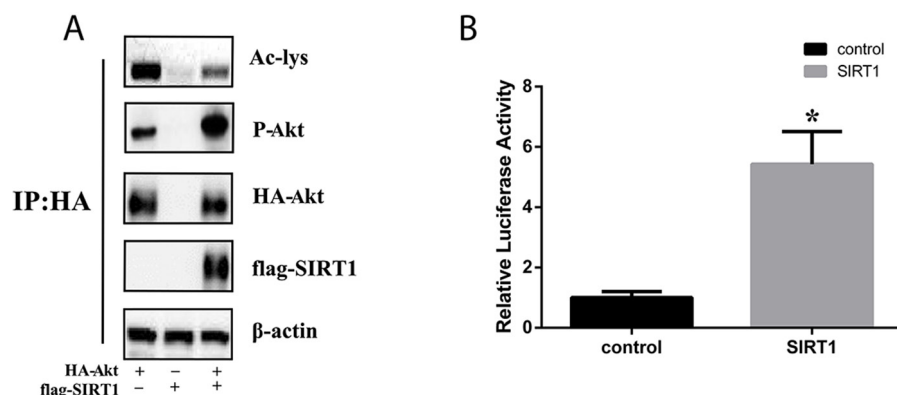

**Supplementary Figure 5: SIRT1 activate Akt and its pathway. (A)** The phosphorylation status and acetylation status of Akt immunoprecipitated from HEK293T cells were determined by immunoblotting. AC-lys: anti-acetyl lysine antibody. **(B)** Luciferase assay of FOXO reporter after co-transfection with SIRT1 expression plasmid in HEK-293T cells. Control group, FOXO reporter after co-transfection with vector, SIRT1 group, FOXO reporter after co-transfection with SIRT1 plasmid. The data are presented as the mean±SD. \*:  $p < 0.05$ ; by Student's *t*-test.

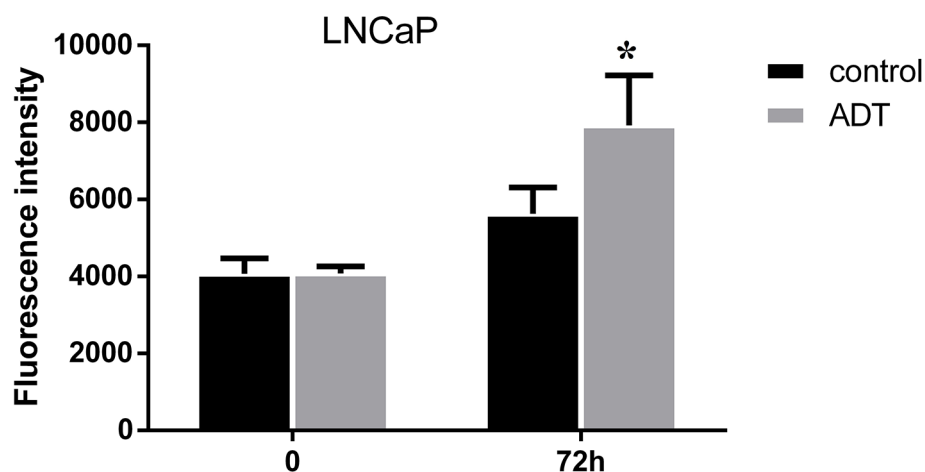

**Supplementary Figure 6: ROS levels in LNCaP cells increased after 72 h under ADT conditions by DCFDA cellular ROS detection assays.** In each group (control and ADT), all the ROS levels were compared with the value before treatment (time point 0) correspondingly. The data represent the mean±SD. \*:  $p < 0.05$  by Student's *t*-test.

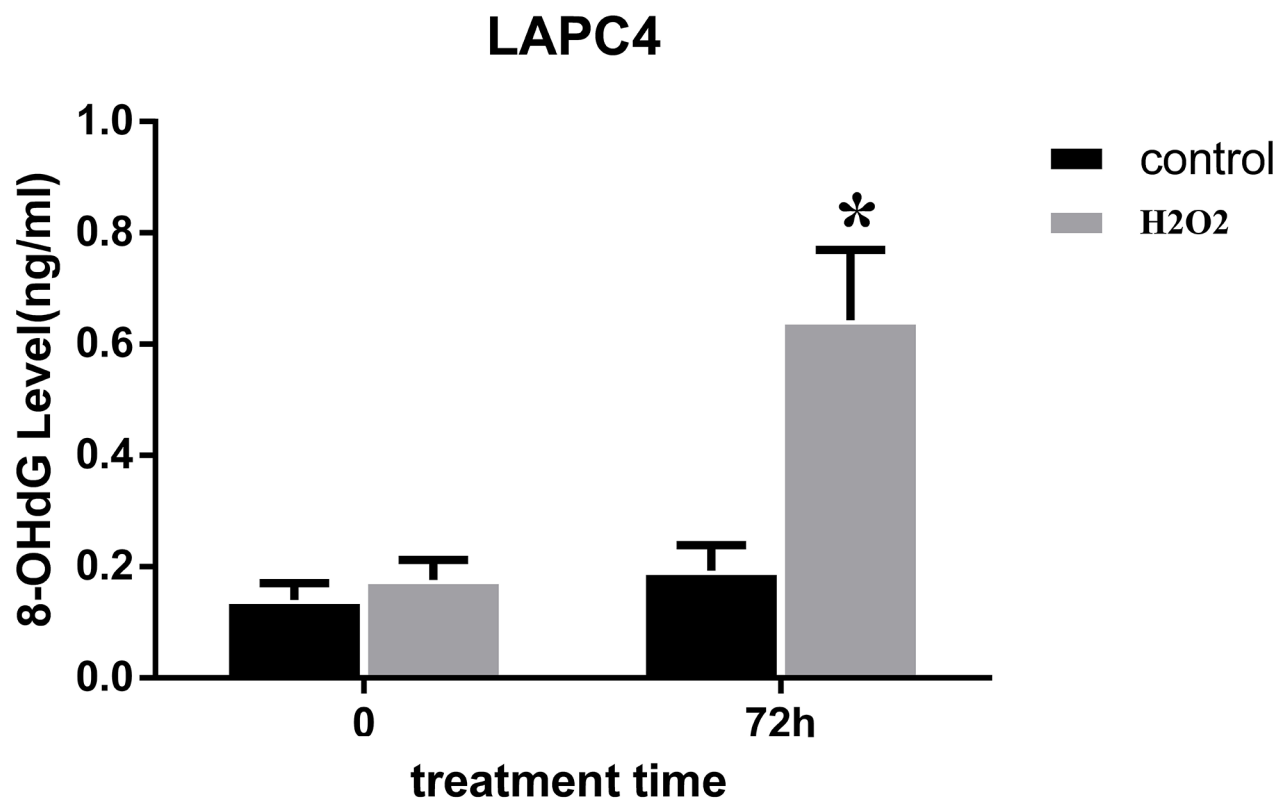

**Supplementary Figure 7: The 8-OHdG levels were measured after LAPC4 cells were cultured under ADT for 72 h.** 8-OHdG levels were compared with the values before treatment (time point 0) correspondingly. Columns, mean of three different experiments; bars, SD. ADT treatment significantly increased 8-OHdG levels (\*,  $P < 0.05$  by Student's *t*-test).

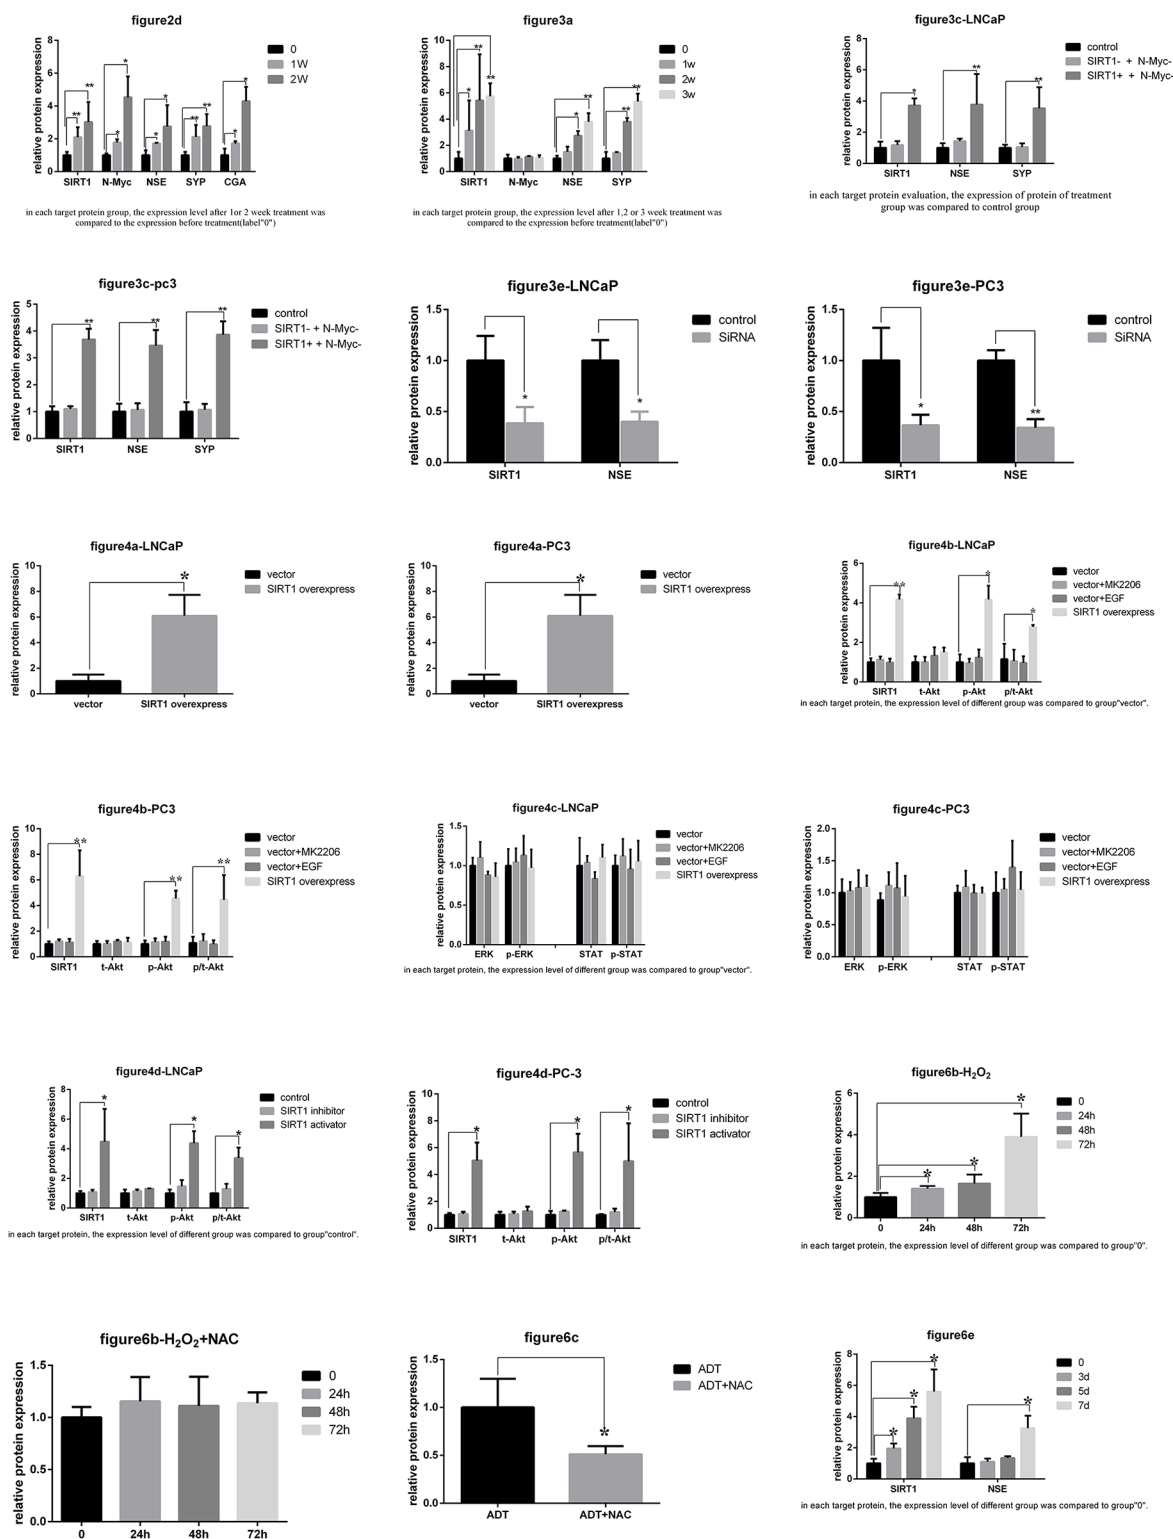

\*,  $p < 0.05$ ; \*\*,  $p < 0.01$

Supplementary Figure 8: Quantitative results of the western blotting.

**Supplementary Table 1: Expression of epigenetic factors in NED of LNCaP cells following ADT.**

**See Supplementary File 1**
